# Supplementary material for: Literature search on risk factors for sarcoma: PubMed and Google Scholar may be complementary sources
Source: Springer Nature journal article supplement (doi:10.1186/1756-0500-3-131), 2010-05-10

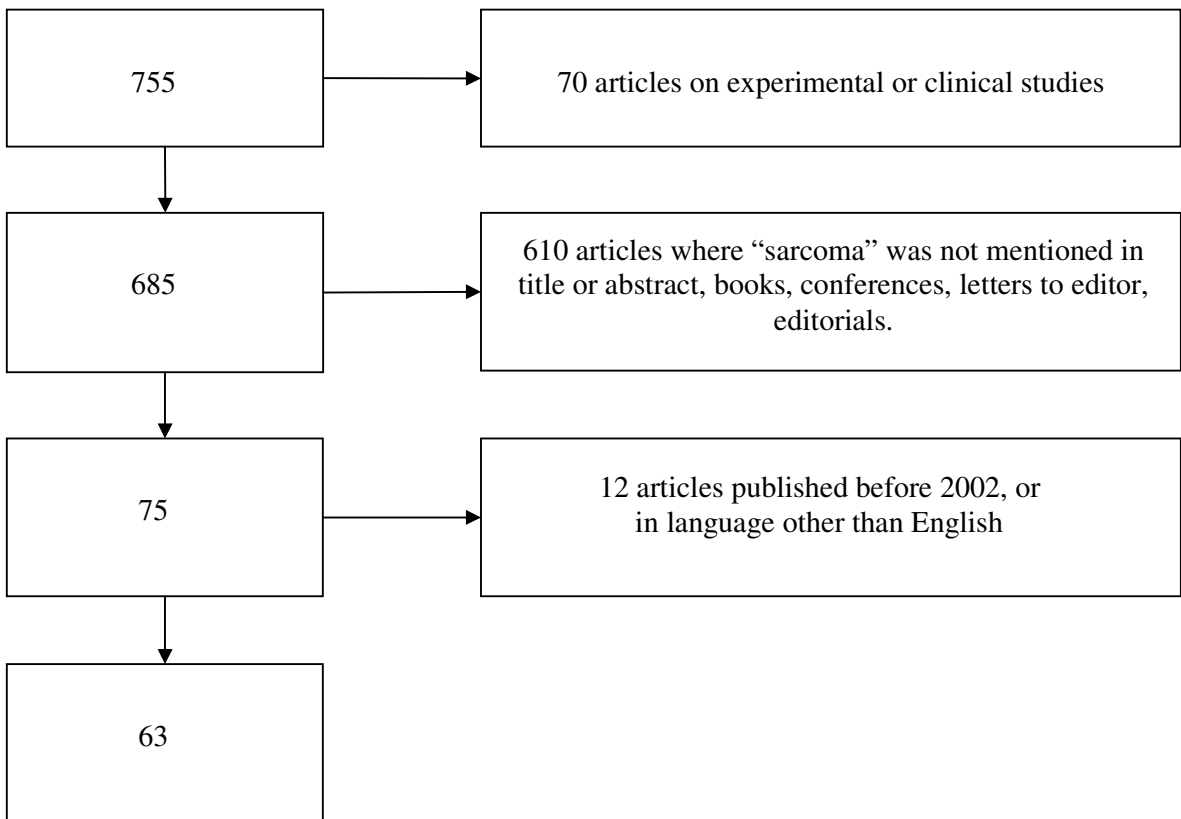

Supplement: 13104_2010_535_MOESM2_ESM.pdf [file 13104_2010_535_MOESM2_ESM.pdf]
