# Supplementary material for: Literature search on risk factors for sarcoma: PubMed and Google Scholar may be complementary sources
Source: Springer Nature journal article supplement (doi:10.1186/1756-0500-3-131), 2010-05-10
Supplement: 13104_2010_535_MOESM3_ESM.pdf [file 13104_2010_535_MOESM3_ESM.pdf]

437

39 articles on experimental or clinical studies

398

327 articles where “sarcoma” was not mentioned in title or abstract, books, conferences, letters to editor, editorials.

67

33 articles published before 2002, or in language other than English

34
