# Supplementary material for: Literature search on risk factors for sarcoma: PubMed and Google Scholar may be complementary sources
Source: Springer Nature journal article supplement (doi:10.1186/1756-0500-3-131), 2010-05-10
Supplement: 13104_2010_535_MOESM5_ESM.pdf [file 13104_2010_535_MOESM5_ESM.pdf]

25

5 articles without “sarcoma” on title or abstract

20

3 articles with experimental or clinical studies

17
